# Supplementary material for: Rubella Virus Infected Macrophages and Neutrophils Define Patterns of Granulomatous Inflammation in Inborn and Acquired Errors of Immunity
Source: Frontiers journal article supplement (doi:10.3389/fimmu.2021.796065), 2021-12-20
Supplement: Data_Sheet_1.PDF [file Data_Sheet_1.PDF]

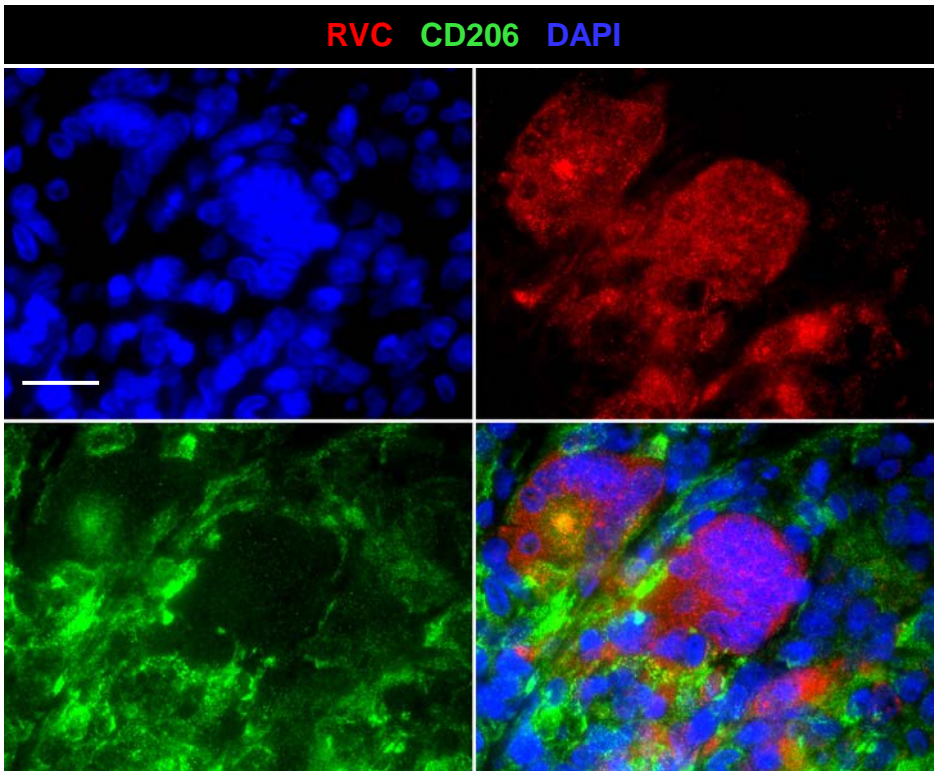

**Supplementary Figure 1** Langhans giant cells in cutaneous granuloma. Double immunofluorescent staining for RVC and CD206 shows the presence of RVC<sup>+</sup> Langhans giant cells (macrophage syncytia) in P16 cutaneous granuloma. Scale bar: 20  $\mu$ m.
